# Supplementary material for: Efficacy of Chinese Herbal Medicine in the Treatment of Moderate-Severe Painful Diabetic Peripheral Neuropathy: A Retrospective Study
Source: Hindawi journal article supplement (doi:10.1155/2019/4035861), 2019-12-24
Supplement: f1 [file 4035861.f1.pdf]

**Fig S1** Protocol for chemical analysis and the HPLC fingerprint of modified HGWD

**(I) HPLC of nine standards**

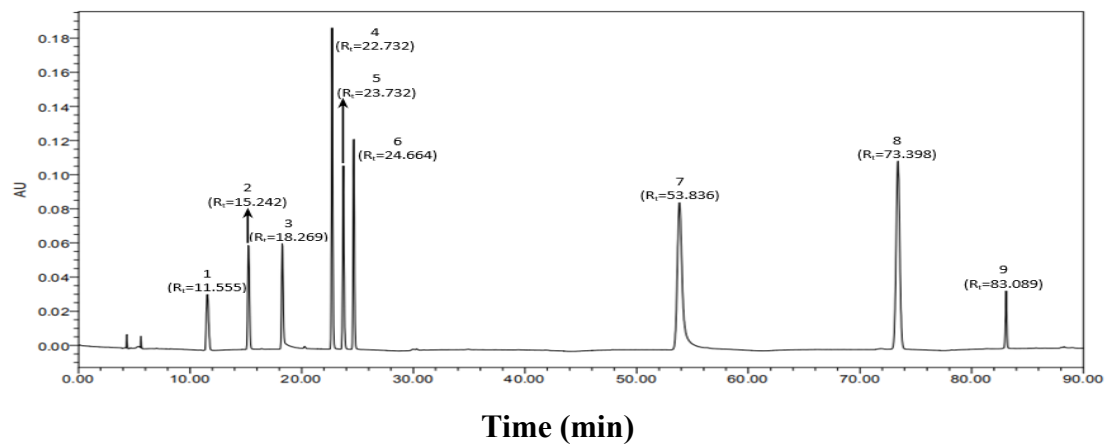

**(II) HPLC of modified HGWD**

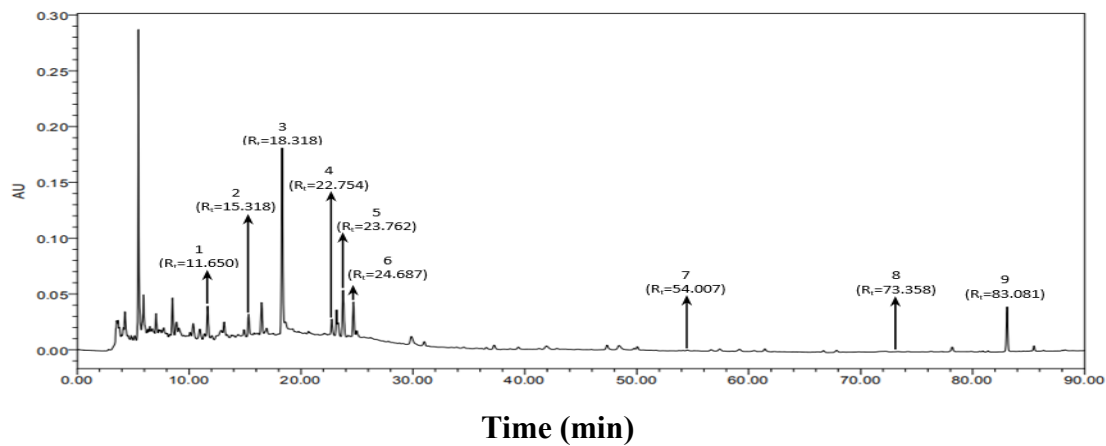

(III) Chemical structures of assayed compounds

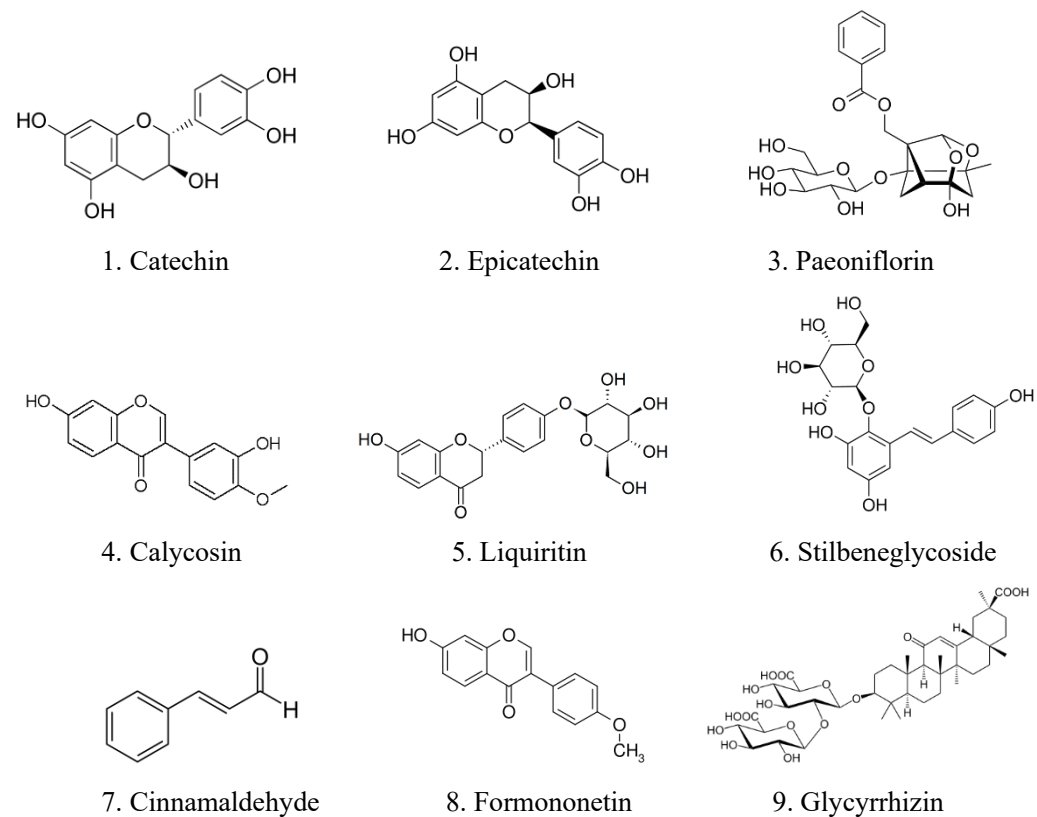

**Fig S1:** The chemical composition of modified Huangqi Guizhi Wuwu Decoction (HGWD) using high-performance liquid chromatography (HPLC) analysis. Modified HGWD was separated on a Luna®Omega Polar C18 (250 mm × 4.6 mm, 3 μm) column. The mobile phase was composed of acetonitrile (A) and 0.1% phosphoric acid (v/v) (B) using the following gradient program: 0–5 min, 14% A; 5–20 min, 14–23% A; 20–30 min, 23–24% A; 30–40 min, 24–27% A; 40–45 min, 27–30% A; 45–70 min, 30–35% A; 70–80 min, 35–45% A; 80–90 min, 45–60% A; the injection volume was 20 μL; the flow rate was 0.6 mL/min; the column

temperature was maintained at 35 °C; the effluent was monitored at 240 nm. Data acquisition and processing were performed by Empower software. The result compound peaks in the chromatograms include the following: 1. Catechin, 2. Epicatechin, 3. Paeoniflorin, 4. Calycosin, 5. Liquiritin, 6. Stilbeneglycoside, 7. Cinnamaldehyde, 8. Formononetin, 9. Glycyrrhizin. HPLC chromatograms of nine standards (I) and modified HGWD decoction (II) are shown. Chemical structures of assayed compounds in the modified HGWD are presented (III).
